# Supplementary material for: Trans-population graph-based coverage optimization of allogeneic cellular therapy
Source: Front Immunol. 2023 May 5;14:1069749. doi: 10.3389/fimmu.2023.1069749 (PMC10227669; doi:10.3389/fimmu.2023.1069749)
Supplement: Supplementary file 1 [file DataSheet_1.xlsx]

## Sheet: Tbl 1 - Key alloIECT trials
Reference	Clinical Trials Registry Number	Disease Indication	Donor source, if stated (bank size)	Methodology				Comments
				Cell type	HLA constraints	Target / Manufacturing	GvHD reduction*		*Beyond relying on higher avidity of the cell product for its intended target than for other recipient tissues.
Liu, et al., 2020	NCT03056339	B cell lymphoma and CLL	MD Anderson Cancer Center (MDACC) CB bank	Cord-blood derived NK cells	Partial matching for 1st 9 subjects, then enrolled with no regard to matching	CD19 targeting CAR, IL15, iCASP9	Inducible caspase 9	No difference in persistence according to degree of HLA mismatch. No alloantibody induction was demonstrated, perhaps due to Flu/Cy lymphodepletion.
Benjamin, et al., 2020	NCT02808442, NCT02746952	B ALL	Not stated, 3rd party	T cells	Not stated	CD19 targeting CAR, TCR KO, CD52 KO	TCR KO	LD includes alumtuzumab
Mailankody, et al., 2021	NCT04093596	MM	Not stated, 3rd party	T cells	Not stated	BCMA targeting CAR, TCR KO, CD52 KO	TCR KO	ALLO-647, an anti-CD52 monoclonal antibody (mAb),
Lekakis, et al., 2021	NCT04416984	B cell lymphoma	Not stated, 3rd party	T cells	Not stated	CD19 targeting CAR, TCR KO, CD52 KO	TCR KO	ALLO-647, an anti-CD52 monoclonal antibody (mAb)
Neelapu, et al., 2021	NCT03939026	B cell lymphoma	Not stated, 3rd party	T cells	Not stated	CD19 targeting CAR, TCR KO, CD52 KO	TCR KO
Quach, et al., 2021	NCT02917083, NCT01555892, NCT00062868	B cell lymphoma	Not stated, 3rd party	T cells	Best of HLA class I and II matching	CD30 targeting CAR, EBV specific TCR	EBV TCR	T cells target CD30 and EBV+ cells
Bachanova, et al., 2021	NCT04245722	B cell lymphoma and CLL	Not stated	IPSC line derived NK cells	Not stated	CD19 targeting CAR, CD16 Fc receptor, IL15/IL15 receptor fusion	NK cells	Targeting occurs via Fc receptor and rituximab or obinutuzumab; Persistence is enhanced via IL15/IL15 receptor fusion for cytokine autonomy
Patel, et al., 2021	NCT04023071	B cell lymphoma	Not stated	IPSC line derived NK cells	Not stated	CD19 targeting CAR, CD16 Fc receptor, IL15/IL15 receptor fusion	NK cells	Targeting occurs via Fc receptor and rituximab or obinutuzumab; Persistence is enhanced via IL15/IL15 receptor fusion for cytokine autonomy
Jain, et al., 2021	NCT03666000	B ALL	Not stated, 3rd party	T cells	Not stated	CD19 targeting CAR	None
Vasu, et al., 2021	NCT04220684	AML/MDS	Cells obtained via "Be the Match Biotherapies"	NK cells	HLA and KIR genotyping (not further described) with demonstration of in vitro expansion		NK cells
Al-Homsi, et al., 2021	NCT04613557	MM	Not stated	T cells	Not stated	BCMA targeting CAR, TCR KO	TCR KO
Ramos, et al., 2021	NCT00840853	B cell lymphoma and ALL	Not stated	NK T cells	Not stated	CD19 targeting CAR, IL-15, and shRNA targeting beta-2 microglobulin and CD74	CD1d-restricted Vα24-invariant natural killer T cells
Li, et al., 2021	ChiCTR1900025311	T cell ALL	Not stated	T cells	Not stated	CD7 targeting CAR, CD7 KO, TCR KO	TCR KO	CD7 knockout incorporated for fratricide prevention
Holstein, et al., 2019	NCT02955550	MM	Not stated	Placental CD34+ cell derived NK cells	Not stated		NK cells	Cells were infused following autologous stem cell transplantation, NK cell infusion was with or without rhIL2
Cooley, et al., 2019	NCT02781467	AML/MDS	Not stated	Placental CD34+ cell derived NK cells	Not stated		NK cells	Subjects received hIL2 with NK cells
Kistler, et al., 2020	Not stated	Breast Cancer	Not stated	NK cells	Not stated		NK cells	Cells were infused with a regimen that included chemoradiation, IgG1 Fc-engineered IL15-complexed protein (N803), adenoviral and yeast tumor-associated antigen vaccines (MUC1, brachyury, CEA) and PD-L1 chickpoint inhibitor
Hu, et al., 2021	Not stated	B cell ALL	Not stated	T cells	Not stated	CD19/CD22 targeting CAR, TCR KO, CD52 KO	TCR KO
Hong, et al., 2020	NCT03841110	Solid tumors and lymphoma	Not stated	iPSC derived NK cells	Not stated		NK cells	NK cells infused alone or with nivolumab, pembrolizumab, or atezolizumab
Qasim, et al., 2017	Special license arrangement for compassionate use (2 UK patients)	B cell ALL	One healthy female	T cells	Not stated ("mismatched")	CD19 targeting CAR, TRAC KO, CD52 KO	TCR disruption, RQR8	Patient 1 had grade 2 skin GvHD treatd with topical and systemic steroids, and rituximab to eliminate the engineered cells ahead of a second transplant. By 8 weeks after infusion, UCART19 cells included both CD3+ and CD3- T cells, indicating notable expansion of the small TCR+ fraction from the initial UCART19 infusion. However, the skin GvHD was caused by male (XY) donor cells detected by FiSH i…
Tzannou, et al., 2019	NCT2313857	CMV post-HCT	CMV seropositive donors (source not stated). Selection-then-elimination of donors who could cover ≥ 2 of 8 shared HLA antigens for 666 HLA types from allogeneic HCT recipients was used to create the bank. (8 donors banked.)	T cells	≥ 2 of 8 shared HLA antigens	Peptide stimulation: IE1, pp65	None	8 sequentially selected donors could cover 96% of the HCT recipients treated at Houston Methodist or Texas Children's Hospital. (8 donors banked / 6 used)
Withers, et al., 2017	NCT02779439	CMV, ADV, or EBV post-HCT	Healthy CMV or EBV seropositive stem cell donors at Westmead Hospital with common HLA types. (31 donors banked.)	T cells	≥ 1 of 6 shared HLA-antigens (-A, -B, -DRB1); highest number of HLA matches with antiviral activity thorugh the shared HLA antigen(s). Secondary preference to products with highest virus-specific MHC-tetramer CD8+ cells or IFNγ response.	Peptide stimulation: pp65, AdV5 Hexon, BZLF1, LMP2, EBNA1	None	Banked: 31 donors. Products from 8 donors were used in multiple patients. Eight subjects received VST products from > 1 donor. Seven centers participated; >95% of patients were treated within 3 days of request.
Leen, et al., 2013	NCT00711035	CMV, ADV, or EBV after HCT	NMDP: CMV, ADV or EBV seropositive with common HLA types, preferably homozygous. (32 donors banked.)	T cells	Specificity for the target virus through a shared HLA allele. Secondary preference to maximize HLA matches.	Transduction with Ad5f35pp65 multivirus-specific vector	None	Of 82 patients screened, a suitable line was identified for 74 subjects (90%) within 24 hours, of whom 50 were subsequently treated. In 6 subjects, high-rhoughput deep sequencing of the TCRvß CDR3 region demonstrated persistence up to 12 weeks.
Haque, et al., 2002, and Haque, et al., 2007 and Haque, et al., 2010	─	PTLD after HCT or SOT	EBV seropositive blood donors at Scottish National Blood Transfusion Services. (100 donors banked.)	T cells	Maximize HLA match out of 6 (HLA-A, B, DR), with ≥1 HLA-A and ≥1 HLA-B match. Seconary preference to CTLs with the highest cytotoxicity in chromium release assays against patient LGLs and low killing of patient PHA blasts, mismatched LCLs, and K562.	Sensitization by EBV-BLCLs	None	Subjects receiving CTLs with closer HLA matching responded better at 6 months. Products with >1% CD4+ T cells were associated with a better response rate.TCRß CDR3 RT-PCR, in 5 subjects, demonstrated perstsience to a maximum of 7 days after the second infusion.
Neuenhanh, et al., 2017	EudraCT 2006-006146-34	CMV after HCT	Deutsche Stammzellspenderdatei registry. (Recruited on demand, not pre-banked.)	T cells	≥ 1 shared HLA class I allele that can restrict the CMV-specific target	Direct isolation: MHC-Streptamer purification of CMV epitope-specific T cells from unstimulatd donor leukapheresis	None	Only 8 of 57 eligible patients transplanted from CMV-negative donors received third-party CMV-specific T cells owing to difficulties with third-party donor identification in 17 subjects (as donor products were not pre-banked) and development of endogenous CMV-specific T cells in 32 subjects.
Tzannou, et al., 2017	NCT02108522	CMV, ADV, EBV, BK or HHV-6 after HCT	Donors already donating marrow or PBSCs to related or unrelated recipients. (59 VST cell lines banked.)	T cells	Specificity for target virus through shared HLA alleles. Secondary preference to overall HLA match. Used epitope mapping, cytokine proiling and cytotoxicity to confirm antiviral activity through ≥ 1 shared HLA allele prior to selecting a VST line.	Peptide stimulation: IE1, pp65, Hexon, Penton, EBNA1, LPM2, BZLF1, VP1, large T, U11, U14, U90	None	Tracking of HLA-restricted epitopes in 16 subjects demonstrated persistence for up to 12 weeks. Frequency of third-part-derived VSTs declined coincident with endogenous immune reconstitution. No suitable VST line could be identified for 2 of 56 patients screened.
Doubrovina, et al., 2012	─	PTLD after HCT	Consenting third-party donors, source not stated. (5 donors, not pre-banked.)	T cells	Selection based on: (a) Cytotoxicity assessed against autologous donor- and patient-derived EBV+ BLCL and EBV- PHA blasts, and (b) against a panel of allogeneic EBV-BLCL, each matching one of the HLA alleles expressed by the T cells. cf. Comments.	Sensitization by EBV-BLCLs	None	Product selection was also based on frequency of EBV-specific T cells was measured by limiting dilution assays for CTLps and by FACS-based quantitation of IFNγ after secondary secoondary stimulation with autolgous EBV-BLCLs compared with autologous PHA blasts. EBV-CTLs were also checked for recognition of endogenous EBV derived from the patient by cytotoxicity against spontaneously transformed EB…
Feuchtinger et al., 2010	─	CMV after UCB	Two mismatched unrelated donors, source not stated. (Not pre-banked.)	T cells	Not stated	Peptide stimulation: pp65, enriched for IFNγ secretion	None
Barker, et al., 2010	─	PTLD after UCB	Third-party HCT donors selected to include 40 common class I HLA alleles that can restrict EBV epitopes; estimated to cover 95% of the New York population (330 cell lines banked.)	T cells	Cytotoxicity in chromium release assay against a panel of EBV+ and EBV- targets expressing one set of HLA A, B, C, DR, DQ alleles shared by the CTL donor. CTLs with closet HLA match to the UCB unit (and hence the lymphoma) restricted by one or more of the CTL donor's HLA alleles, and HLA match > 2/10 to the patient, were selected.	Sensitization by EBV-BLCLs	None	This cell bank was licensed by Atara Bio in 2015 and is also described in the publication below.
Prockop, et al., 2020	NCT01498484 & NCT00002663	PTLD after HCT or SOT	Third-party HCT donors selected to include 40 common class I HLA alleles that can restrict EBV epitopes; estimated to cover 95% of the New York population. (330 cell lines banked.)	T cells	HLA type, immune phenotype, lack of alloreactivity, EBV-specific cytotoxicity, and HLA restriction as per Doubrovina, et al., 2012.	Sensitization by EBV-BLCLs	None	Having > 1 shared HLA allele restriction was associated with greater likelihood of response compared to only 1 shared allele restriction. Possible utility of switching donors: In 3 of 5 subjects with progression after Cycle 1 who received EBV-CTLs from a difference donor, CR/sustained PR was achieved in 60%.
Papadopoulou, et al., 2014	NCT01570283	CMV, ADV, EBV, BK or HHV-6 after HCT	Not stated (48 multivirus-specific cell lines banked.)	T cells	Specificity for target virus if reactivation/infection (vs. prophylaxis)	Peptide stimulation: IE1, pp65, Hexon, Penton, EBNA1, LPM2, BZLF1, VP1	None
Muftuoglu, et al., 2018	NCT02479698	PML	Not stated (27 donors banked.)	T cells	Most closely matched (minimum requirement: ≥ 1 HLA class I and ≥ 1 HLA class II allele match)	Peptide stimulation: VP1, VP2, VP3, ST, LT	None	BK virus-specific product used to treat disease caused by JC virus. Cell persistence (flow cytometry assay based on Bw4/Bw6 mismatch) led to detection of third-party cells in CSF at > 250 days.
Sun, et al., 2002	─	EBV+ Hodgkin lymphoma	NMDP (not pre-banked)	T cells	Minimum ≥3/6 HLA match	Sensitization by EBV-BLCLs	None	Of 13 patients screened, 4 died of rapidly progressive disease - perhaps showing a need for banked cell products or rapid product generation techniques. Only one patient in the study received a third-party infusion from a 4/6 matched donor identified by the NMDP.
Gallot, et al., 2014	NCT01823718	PTLD after HCT or SOT, EBV+ lymphoma after autologous HCT	EBV seropositive, CMV seronegative blood donors at the Établissement Français du Sang (13 donors banked.)	T cells	≥ 1 match for HLA class 1 and EBV specificity through a shared HLA allele (priority); negative cytotoxicity test against the patient's PHA blasts; EBV-CTLs cytotoxicity score > 15% against the autolgous EBV-LCLs and >2× that observed against patient PHA blasts	Sensitization by EBV-BLCLs	None	Closer HLA match and earlier time from transplant to CTL infusion were associated with complete remission. Persistence was assessed with RT-PCR for 19 SNPs, and was never detected beyond 10 days.
Naik, et al., 2016	NCT01945814; NCT02510404; 2 EINDs	Primary immunodeficiency: EBV or CMV prior to or after HCT; PTLD	Various	T cells	Various strategies. Donors were 3/10 to 9/10 matched to patients.	Various	None	Retrospective review of PID patients treated between 2003 and 2014 at 4 institutions. Only subjects receiving third-party, unrelated (not original stem cell donor or haploidentical) products and not published elsewhere are abstracted here.
Vickers, et al., 2014 and Kazi, et al., 2019	─	Primary immunodeficiency with EBV pre-HCT; PTLD or EBV after HCT or SOT	EBV seropositive, preferable blood group O donors from the New Zealand Blood Service - to minimize the risk of CJD (25 banked, selected	T cells	Maximize HLA class I and II matches, then minimize number of mismatches.	Sensitization by EBV-BLCLs	None	Donors were selected for banking based on HLA typing, according to a simulation using 200 donors from Auckland, New Zealand targeting 304 patients from East of Scotland renal treansplant waiting list, aiming to maximize the number of HLA class I and II matches and minimize the number of mismatches. Donor-recipient pairs were scores as 2 for 2 antigens shared at any one locus, 1 for one antigen sh…
Chiou, et al., 2018	─	PTLD after SOT	EBV seropositive blood donors at Scottish National Blood Transfusion Services. (Bank was licensed in 2011.)	T cells	Maximize HLA match (pre-2005 - out of 6 loci; post-2005 - out of 10 loci)	Sensitization by EBV-BLCLs	None	Higher response rate was observed among this pediatric, exclusively SOT cohort than reported by colleagues using the same bank (Haque et al,) in mostly adult SOT & HCT patients.
Fabrizio, et al., 2021	NCT02136797	CMV after HCT	Healthy HCT donors at Memorial-Sloan Kettering Cancer Center (135 banked)	T cells	Not explicitly stated	Peptide stimulation: 15-mer overlapping peptides spanning pp65	None	This aim of this study was to assess recipient immune reconstitution. Recipients with baseline CD4+ T cells > 50 × 10^6/L had higher response to therapy. Recipients of original HCT donor-derived CMV-specific T cells on protocols NCT02136797 and NCT00674648 had similar immune reconstitution kinetics as those who received third-party products.
Jiang, et al., 2022	ACTRN1268000343202	CMV, EBV after HCT	Healthy allogeneic donors recruited from Westmead Hospital, seropositive for CMV or EBV (12 donors, 17 products banked including 5 for adenovirus not reported here)	T cells	Maximize the number of HLA matches with antiviral activity through shared HLA antigen(s), out of 6. Secondary preference to the product with the highest proportion of virus-specific responses through shared allele(s).	Peptide stimulation: pp65 and EBV consensus peptides. Then CD137+ cells were selected and sensitized in culture by peptide-pulsed CD137- cells.	None	Concomittant antiviral treatment was given. Most patients had received in vivo T cell depletion or CD34-selected grafts. Patients remained on immunosuppression and were early post-HCT. Virologic CR 94%, durable. Median persistence 55 days. Suggestion that >2 HLA matches was associated with less need for repeated antiviral courses (p = 0.046).

## Sheet: Tbl 2 - Genetic engineering
Modification	Engineering Method	GvHD risk reduction	Rejection risk reduction	References
TCR disruption/knockout	CRISPR/Cas9	Yes	No	Shiqi Li, Lei Gao, Zhongtao Yuan, Kun Wu, Lin Liu, Le Luo, Yao Liu, Cheng Zhang, Yu Li, Duanpeng Wang, Zhimin Li, Xu Tan, Ruihao Huang, Dingsong Zhang, Youcheng Wang, Xinxin Wang, Jia Liu, Martina Sersch, Sanbin Wang, Xi Zhang; Abstract LB147: Updates on clinical safety and efficacy result of GC027, the first-in-human, “Off-the-Shelf” CD7 CAR-T stand-alone therapy for adult patients with relapsed…
				Yongxian Hu, Yali Zhou, Mingming Zhang, Wengang Ge, Yi Li, Li Yang, Guoqing Wei, Lu Han, Hao Wang, Shuhui Yu, Yi Chen, Yanbin Wang, Xiaohong He, Xingwang Zhang, Ming Gao, Jingjing Yang, Xiuju Li, Jiangtao Ren, He Huang; CRISPR/Cas9-Engineered Universal CD19/CD22 Dual-Targeted CAR-T Cell Therapy for Relapsed/Refractory B-cell Acute Lymphoblastic Leukemia. Clin Cancer Res 15 May 2021; 27 (10): 2764…
	mRNA TALEN	Yes	No	Benjamin R, Graham C, Yallop D, et al. Genome-edited, donor-derived allogeneic anti-CD19 chimeric antigen receptor T cells in paediatric and adult B-cell acute lymphoblastic leukaemia: results of two phase 1 studies. Lancet. 2020;396(10266):1885–1894.
				Sham Mailankody, Michaela Liedtke, Surbhi Sidana, Jeffrey V. Matous, Saurabh Chhabra, Olalekan O. Oluwole, Shahbaz A. Malik, Shaji Kumar, Rajneesh Nath, Faiz Anwer, Jose Carlos Cruz, Sundar Jagannath, Myo Htut, Noopur S. Raje, David S. Siegel, Erin E. Karski, Wade Lovelace, Afrodite Lourbakos, Srinand Ponnathapura Nandakumar, Arun Balakumaran, Parameswaran Hari; Universal Updated Phase 1 Data Val…
				Lazaros J. Lekakis, Frederick L. Locke, Michael Tees, Sattva S. Neelapu, Shahbaz A. Malik, Mehdi Hamadani, Matthew J. Frank, Leslie L. Popplewell, Jeremy S. Abramson, Sven de Vos, Javier Munoz, Chu Ri Shin, Arun Balakumaran, Lynn Loomis-Navale, Lovely Goyal, Xiangdong Zhou, David B. Miklos; ALPHA2 Study: ALLO-501A Allogeneic CAR T in LBCL, Updated Results Continue to Show Encouraging Safety and E…
				Sattva S. Neelapu, Rajneesh Nath, Javier Munoz, Michael Tees, David B. Miklos, Matthew J. Frank, Shahbaz A. Malik, Don Stevens, Chu Ri Shin, Arun Balakumaran, Lynn Loomis-Navale, Lovely Goyal, Anh Nguyen, Frederick L. Locke; ALPHA Study: ALLO-501 Produced Deep and Durable Responses in Patients with Relapsed/Refractory Non-Hodgkin's Lymphoma Comparable to Autologous CAR T. Blood 2021; 138 (Supplem…
	shRNA targeting CD3z transduction	Yes	No	Ahmad-Samer Al-Homsi, Sebastien Anguille, Dries Deeren, Taiga Nishihori, Nathalie Meuleman, Maher Abdul-Hay, Gareth J. Morgan, Jason Brayer, Nathalie Braun, Caroline Lonez, Marie-Sophie Dheur, Erik Alcantar-Orozco, David Gilham, Anne Flament, Frédéric F. Lehmann; Immunicy-1: Targeting BCMA with Cyad-211 to Establish Proof of Concept of an shRNA-Based Allogeneic CAR T Cell Therapy Platform. Blood …
CD52 disruption/knockout	mRNA TALEN	No	Yes	Benjamin R, Graham C, Yallop D, et al. Genome-edited, donor-derived allogeneic anti-CD19 chimeric antigen receptor T cells in paediatric and adult B-cell acute lymphoblastic leukaemia: results of two phase 1 studies. Lancet. 2020;396(10266):1885–1894.
				Sham Mailankody, Michaela Liedtke, Surbhi Sidana, Jeffrey V. Matous, Saurabh Chhabra, Olalekan O. Oluwole, Shahbaz A. Malik, Shaji Kumar, Rajneesh Nath, Faiz Anwer, Jose Carlos Cruz, Sundar Jagannath, Myo Htut, Noopur S. Raje, David S. Siegel, Erin E. Karski, Wade Lovelace, Afrodite Lourbakos, Srinand Ponnathapura Nandakumar, Arun Balakumaran, Parameswaran Hari; Universal Updated Phase 1 Data Val…
				Lazaros J. Lekakis, Frederick L. Locke, Michael Tees, Sattva S. Neelapu, Shahbaz A. Malik, Mehdi Hamadani, Matthew J. Frank, Leslie L. Popplewell, Jeremy S. Abramson, Sven de Vos, Javier Munoz, Chu Ri Shin, Arun Balakumaran, Lynn Loomis-Navale, Lovely Goyal, Xiangdong Zhou, David B. Miklos; ALPHA2 Study: ALLO-501A Allogeneic CAR T in LBCL, Updated Results Continue to Show Encouraging Safety and E…
				Sattva S. Neelapu, Rajneesh Nath, Javier Munoz, Michael Tees, David B. Miklos, Matthew J. Frank, Shahbaz A. Malik, Don Stevens, Chu Ri Shin, Arun Balakumaran, Lynn Loomis-Navale, Lovely Goyal, Anh Nguyen, Frederick L. Locke; ALPHA Study: ALLO-501 Produced Deep and Durable Responses in Patients with Relapsed/Refractory Non-Hodgkin's Lymphoma Comparable to Autologous CAR T. Blood 2021; 138 (Supplem…
	CRISPR/Cas9	No	Yes	Yongxian Hu, Yali Zhou, Mingming Zhang, Wengang Ge, Yi Li, Li Yang, Guoqing Wei, Lu Han, Hao Wang, Shuhui Yu, Yi Chen, Yanbin Wang, Xiaohong He, Xingwang Zhang, Ming Gao, Jingjing Yang, Xiuju Li, Jiangtao Ren, He Huang; CRISPR/Cas9-Engineered Universal CD19/CD22 Dual-Targeted CAR-T Cell Therapy for Relapsed/Refractory B-cell Acute Lymphoblastic Leukemia. Clin Cancer Res 15 May 2021; 27 (10): 2764…
CD7 disruption/knockout	CRISPR/Cas9	No	Yes	Shiqi Li, Lei Gao, Zhongtao Yuan, Kun Wu, Lin Liu, Le Luo, Yao Liu, Cheng Zhang, Yu Li, Duanpeng Wang, Zhimin Li, Xu Tan, Ruihao Huang, Dingsong Zhang, Youcheng Wang, Xinxin Wang, Jia Liu, Martina Sersch, Sanbin Wang, Xi Zhang; Abstract LB147: Updates on clinical safety and efficacy result of GC027, the first-in-human, “Off-the-Shelf” CD7 CAR-T stand-alone therapy for adult patients with relapsed…
CD74 disruption/knockout	shRNA targeting CD74	No	Yes	Carlos A. Ramos, Amy N. Courtney, Simon N. Robinson, Olga Dakhova, Premal D. Lulla, Rammurti Kamble, George Carrum, Tao Wang, Chunchao Zhang, Erica Di Pierro, Leonid S. Metelitsa; Allogeneic NKT Cells Expressing a CD19-Specific CAR in Patients with Relapsed or Refractory B-Cell Malignancies: An Interim Analysis. Blood 2021; 138 (Supplement 1): 2819. doi: https://doi.org/10.1182/blood-2021-149712
Beta2M disruption/knockout	shRNA targeting beta-2 microglobulin	No	Yes	Carlos A. Ramos, Amy N. Courtney, Simon N. Robinson, Olga Dakhova, Premal D. Lulla, Rammurti Kamble, George Carrum, Tao Wang, Chunchao Zhang, Erica Di Pierro, Leonid S. Metelitsa; Allogeneic NKT Cells Expressing a CD19-Specific CAR in Patients with Relapsed or Refractory B-Cell Malignancies: An Interim Analysis. Blood 2021; 138 (Supplement 1): 2819. doi: https://doi.org/10.1182/blood-2021-149712
HLA class II transactivator disruption/knockout	CRISPR/Cas9	No	Yes	(Preclinical) Wang B, Iriguchi S, Waseda M, Ueda N, Ueda T, Xu H, Minagawa A, Ishikawa A, Yano H, Ishi T, Ito R, Goto M, Takahashi R, Uemura Y, Hotta A, Kaneko S. Generation of hypoimmunogenic T cells from genetically engineered allogeneic human induced pluripotent stem cells. Nat Biomed Eng. 2021 May;5(5):429-440. doi: 10.1038/s41551-021-00730-z. Epub 2021 May 17. PMID: 34002062.
Chimeric 4-1BB alloimmune defense receptor	γ-retroviral transduction	No (so concurrently knocked out the TCR)	Yes	(Preclinical) Mo F, Watanabe N, McKenna MK, Hicks MJ, Srinivasan M, Gomes-Silva D, Atilla E, Smith T, Ataca Atilla P, Ma R, Quach D, Heslop HE, Brenner MK, Mamonkin M. Engineered off-the-shelf therapeutic T cells resist host immune rejection. Nat Biotechnol. 2021 Jan;39(1):56-63. doi: 10.1038/s41587-020-0601-5. Epub 2020 Jul 13. PMID: 32661440; PMCID: PMC7854790.

## Sheet: Tbl 3 Anti-cancer T and NK
Author	Clinical Trials Identifier	Journal	Year	Patient Population	Donor Source	Donor Algorithm	Indication	Cell Product	Target Antigen	GVHD reduction	Dosing	LD	Schedule	Response Definition	Response Rate (%)	Response Duration	Cell Persistence Duration	Detection Method	Comments	References
Liu	NCT03056339	NEJM	2020	11 adults	MD Anderson cord blood bank	First 9 patients: 4/6 HLA match.Then enrolled without regard to HLA matching (resulting in matched at 1-2 of 6 loci).	CLL (N = 5), follicular lymphoma, or DLBCL; Nine of 11 patients were relapsed or refractory to autologous HCT, ibrutinib, and/or venetoclax	CD19 CAR (CD38ζ)m IL-15, iCasp9 NK	CD19	iCASP9	Dose level cohorts: (1) 1 × 10^5 cells/kg, (2) 1 × 10^6 cells/kg, (3) 1 × 10^7 cells/kg	Flu/Cy	Once	Lugano criteria for Hogkin and NHL; iwCLL criteria for CLL	73% (CR: 64%). CR included CLL (N = 3) and lymphoma (N = 4).	Not assessable due to administration of other therapies, starting 30 days after CAR-NK infusion.	>12 months. Homing to sites of disease was also demonstrated.	RT-qPCR (vector transgene copies/ug genomic DNA). Flow cytometry based on HLA disparity.	Transduction efficienxy of final product: 49% (range 22.7-66.5%). Retroviral vector. No difference in persistence according to degree of HLA mismatch. No alloantibody induction was demonstrated.	Liu E, Marin D, Banerjee P, Macapinlac HA, Thompson P, Basar R, Nassif Kerbauy L, Overman B, Thall P, Kaplan M, Nandivada V, Kaur I, Nunez Cortes A, Cao K, Daher M, Hosing C, Cohen EN, Kebriaei P, Mehta R, Neelapu S, Nieto Y, Wang M, Wierda W, Keating M, Champlin R, Shpall EJ, Rezvani K. Use of CAR-Transduced Natural Killer Cells in CD19-Positive Lymphoid Tumors. N Engl J Med. 2020 Feb 6;382(6):5…
Qasim	NHS Special License Number MS 17328	Sci Transl Med	2017	2 pediatric	One healthy female	Not stated	B ALL, relapsed after alloHCT	CD19 CAR, CD52 and TRAC disruption, RQR8	CD19	Disruption of TCR expression and RQR8 (susceptible to rituximab)	4 and 4.6 × 10^6/kg	Flu/Cy + alemtuzumab	Once	Cytogenetic and molecular remission	100% (N = 2 subjects, both achieved moecular CR)	> 9-10 weeks (cannot be assessed further due to second transplants)	>9-10 weeks (terminated intentionally with rituximab)	Lentivral VCN per cell in PBMC and BM. Flow cytometry using anti-F(ab)2 in subject 1.	Patient 1 had grade 2 skin GvHD treatd with topical and systemic steroids, and rituximab to eliminate the engineered cells ahead of a second transplant. By 8 weeks after infusion, UCART19 cells included both CD3+ and CD3- T cells, indicating notable expansion of the small TCR+ fraction from the initial UCART19 infusion. However, the skin GvHD was caused by male (XY) donor cells detected by FiSH i…	Qasim W, Zhan H, Samarasinghe S, Adams S, Amrolia P, Stafford S, Butler K, Rivat C, Wright G, Somana K, Ghorashian S, Pinner D, Ahsan G, Gilmour K, Lucchini G, Inglott S, Mifsud W, Chiesa R, Peggs KS, Chan L, Farzeneh F, Thrasher AJ, Vora A, Pule M, Veys P. Molecular remission of infant B-ALL after infusion of universal TALEN gene-edited CAR T cells. Sci Transl Med. 2017 Jan 25;9(374):eaaj2013. d…
Benjamin	NCT02808442, NCT02746952	Lancet	2020	7 pediatric, 14 adults	3rd party	Not stated	B ALL	CD19 CAR, TCR KO, CD52 KO T cells	CD19	TCR KO	Pediatric: 1.1-2.3x1-^6/kg; Adult: 6x10^6, 6-8x10^7 or 1.8-2.4x10^8	Flu/Cy +/- Campath	Once		67% CR/Cri; 4 patients not receive capmth did not have expansion/anti-leukemic efficacy of product			RQR8		Benjamin R, Graham C, Yallop D, et al. Genome-edited, donor-derived allogeneic anti-CD19 chimeric antigen receptor T cells in paediatric and adult B-cell acute lymphoblastic leukaemia: results of two phase 1 studies. Lancet. 2020;396(10266):1885–1894. PMID: 33308471. doi: 10/1016/S0140-6736(20)32334-5.
Mailankody	NCT04093596	ASH Abstract	2021	42 adults	3rd party	Not stated	MM ≥3 prior lines of therapy including a proteasome inhibitor, immunomodulator, and anti-CD38 mAb, Patients (pts) must be refractory to their last treatment line.	BCMA CAR, TCR KO, CD52 KO T cells	BCMA	TCR KO	40, 160 ,320 and 480x10^6	Flu/Cy, Flu/Cy/anti-CD52 (ALLO-647), Cy/anti-CD52 (ALLO-647)	Once	Not stated	DL3+ (n=26): 61.5% ORR, VGPR+ 38.5%; n=8 MRD-	DL3+ 8.3mo	Not stated	Not stated		Sham Mailankody, Michaela Liedtke, Surbhi Sidana, Jeffrey V. Matous, Saurabh Chhabra, Olalekan O. Oluwole, Shahbaz A. Malik, Shaji Kumar, Rajneesh Nath, Faiz Anwer, Jose Carlos Cruz, Sundar Jagannath, Myo Htut, Noopur S. Raje, David S. Siegel, Erin E. Karski, Wade Lovelace, Afrodite Lourbakos, Srinand Ponnathapura Nandakumar, Arun Balakumaran, Parameswaran Hari; Universal Updated Phase 1 Data Val…
Lekakis	NCT04416984	ASH Abstract	2021	12 adults	3rd party	Not stated	Relapsed/refractory large B-cell lymphoma with ≥2 prior lines of therapy (including an anthracycline and anti-CD20 mAb), ECOG performance status of 0/1.	CD19 CAR, TCR KO, CD52 KO T cells	CD19	TCR KO	40 or 120 x 10^6 cells or consolidation at DL2 (≥stable disease at day 28 with ALLO-647)	Flu/Cy/anti-CD52 (ALLO-647)	Once or twice	Not stated	12 evaluable pts (6 each treated in the single dose and consolidation dose cohort), both the overall response rate (ORR) and complete response (CR) were 50% (95% CI: 21.1, 78.9). In the consolidation cohort, both ORR and CR rate were 66.7% (95% CI: 22.3, 95.7) with 3/3 partial responses (PRs) converting to CR after consolidation; 1 pt had CR at days 28 and 56 post consolidation and 2 pts had PD a…	Not stated	Not stated	Not stated		Lazaros J. Lekakis, Frederick L. Locke, Michael Tees, Sattva S. Neelapu, Shahbaz A. Malik, Mehdi Hamadani, Matthew J. Frank, Leslie L. Popplewell, Jeremy S. Abramson, Sven de Vos, Javier Munoz, Chu Ri Shin, Arun Balakumaran, Lynn Loomis-Navale, Lovely Goyal, Xiangdong Zhou, David B. Miklos; ALPHA2 Study: ALLO-501A Allogeneic CAR T in LBCL, Updated Results Continue to Show Encouraging Safety and E…
Neelapu	NCT03939026	ASH Abstract	2021	46 adults	3rd party	Not stated	Relapsed/refractry large B-cell lymphoma or follicular lymphoma and ≥2 prior lines of therapy (including an anti-CD20 mAb, no donor speicif antibodies or rituximab >15ng/mL)	CD19 CAR, TCR KO, CD52 KO T cells	CD19	TCR KO	40, 120, or 360 x 10^6 cells; consolidation cohort DL2 with ALLO-647 (≥stable disease at D28)	Flu/Cy/anti-CD52 (ALLO-647, differing doses)	Once or twice	Not stated	CAR T naïve pts (n=36) to those that were not. Objective response and complete response rates were 75% and 50% ( LBCL (n=13) ORR 61.5% and CR 46.2%;, FL (n=23) ORR 82.6%and CR 52.2%; 7 pts received 2nd cell dose (4 FL) ORR 100% and CR 75%.	Not stated	Not stated	Not stated		Sattva S. Neelapu, Rajneesh Nath, Javier Munoz, Michael Tees, David B. Miklos, Matthew J. Frank, Shahbaz A. Malik, Don Stevens, Chu Ri Shin, Arun Balakumaran, Lynn Loomis-Navale, Lovely Goyal, Anh Nguyen, Frederick L. Locke; ALPHA Study: ALLO-501 Produced Deep and Durable Responses in Patients with Relapsed/Refractory Non-Hodgkin's Lymphoma Comparable to Autologous CAR T. Blood 2021; 138 (Supplem…
Quach	NCT02917083, NCT01555892, NCT00062868	ASH Abstract	2021, updated 2022	14 adults	3rd party	Best of HLA class I and II matching	Relapsed/refractory CD30+ lymphoma	CD30 CAR, EBV specific T cells	CD30 and EBV	EBV TCR	4x10^7, 1x10^8 or 4x10^8 cells	Flu/Cy		Lugano criteria	4 PR, 5/10 (50%) patients at DL2 and DL3 had CR, ORR 69.2%.	Not stated	1 week	qPCR for the transgene	Epitope spreading was not detected.	David H. Quach, Carlos A. Ramos, Premal D. Lulla, Sandhya Sharma, Haran R. Ganesh, Yezan F. Hadidi, Sachin G. Thakkar, Luis Becerra-Dominguez, Birju Mehta, Silvana Perconti, Eric Anderson, Emily M. Hsieh, Olga Dakhova, Huimin Zhang, Bambi J. Grilley, Malcolm K. Brenner, Helen E. Heslop, Rayne H. Rouce, Natalia Lapteva, Cliona M. Rooney; Safety and Efficacy of Off-the-Shelf CD30.CAR-Modified Epste…
Bachanova	NCT04245722	ASH Abstract	2021	20 adults	3rd party	Not stated	B cell lymphoma and CLL	CD19 CAR IPSC line derived NK cells, CD16 Fc receptor, IL15/IL15 receptor fusion	CD19	NK cells	30x10^6 and 900x10^6 cells	Flu/Cy +/- rituximab or obinutuzumab	Once or twice		5/8 received 30x10^6 cells and 4/9 received 900x10^6 cells achived a response; 10/15 that received single dose acheived response (9 CR); 5 recieved second dose and 4 continued their CR and 1 had improved PR	Not stated	Not stated	Not stated		Veronika Bachanova, Armin Ghobadi, Krish Patel, Jae H Park, Ian W. Flinn, Prutha Shah, Carol Wong, Cara Bickers, Peter Szabo, Lilly Wong, Bahram Valamehr, Siminder Atwal, Yu-Waye Chu, Rebecca Elstrom, Paolo Strati; Safety and Efficacy of FT596, a First-in-Class, Multi-Antigen Targeted, Off-the-Shelf, iPSC-Derived CD19 CAR NK Cell Therapy in Relapsed/Refractory B-Cell Lymphoma. Blood 2021; 138 (Su…
Patel	NCT04023071	ASH Abstract	2021	13 adults	3rd party	Not stated	B cell lymphoma	IPSC line derived NK cells, CD16 Fc receptor	Fc	NK cells	3 weekly doses (30-900x10^6 cells/dose)	Flu/Cy/rituximab or obinutuzumab/IL2	weekly x3	Lugano criteria	72% that received ≥90x10^6 cells achieved an response, 7 CR. 2 that received 30x10^6 cells progressed.	Not stated	Not stated	Not stated		Krish Patel, Veronika Bachanova, Aaron M Goodman, John M. Pagel, Kelly Griffis, Marlisa Anderson, Siminder Atwal, Cara Bickers, Peter Szabo, Lilly Wong, Yu-Waye Chu, Rebecca Elstrom, Paolo Strati; Phase I Study of FT516, an Off-the-Shelf iPSC-Derived NK Cell Therapy, in Combination with Rituximab in Patients with Relapsed/Refractory B-Cell Lymphoma. Blood2021; 138 (Supplement 1): 3873. doi: https…
Jain	NCT03666000	ASH Abstract	2021	15 adults	3rd party	Not stated	B ALL	CD19 CAR	CD19		3x10^6 CAR-T cells/kg or 5x10^8 cells	Flu/Cy	once	Not stated	complete response (CR) or CRi (incomplete marrow recovery) rate at Day ≥28 is 33% (2/6) in DL3/4a and sLD, 80% (4/5) in DL3/4a with eLD and 75% (3/4) in DL4b with sLD. Importantly, 4/15 (27%) responding subjects underwent allo-SCT, with one additional subject not able to receive transplant due to eligibility yet maintaining an MRD- CR for >250 days, and one refusing to proceed with transplant.	Not stated	Not stated	Not stated		Nitin Jain, Hagop Kantarjian, Scott R. Solomon, Fiona He, Craig S. Sauter, Christopher R. Heery, Alan F. List, Mark C. Johnson, Yu Lou, Monika Vainorius, Koen van Besien, Adam J. Olszewski, Anthony S. Stein, Bijal D. Shah; Preliminary Safety and Efficacy of PBCAR0191, an Allogeneic 'Off-the-Shelf' CD19-Directed CAR-T for Patients with Relapsed/Refractory (R/R) CD19+ B-ALL. Blood 2021; 138 (Supple…
Vasu	NCT04220684	ASH Abstract	2021	6 adults	3rd party	HLA and KIR genotyping with demonstration of in vitro expansion	AML/MDS	HLA mismatched NK cells		NK cells	1 x 10e7 NK cells/ kg	Flu/Cytarabine or Flu/Decitabine	6 doses over 2 weeks	Not stated	Not stated	Not stated	Not stated	Not stated		Sumithira Vasu, Nidhi Sharma, Alison R. Walker, Sarah A Wall, James S. Blachly, Greg K. Behbehani, Hannah Choe, Aarohi Thakkar, Robin Nakkula, Ella Troy, Nicole Szuminski, Marcos J.G. de Lima, Lynn O'Donnell, Dean Anthony Lee; A Phase I Clinical Trial Testing the Safety of IL-21-Expanded, Universally Alloreactive Donor-Derived Natural Killer Cells for Relapsed/Refractory Acute Myeloid Leukemia an…
Al-Homsi	NCT04613557	ASH Abstract	2021	9 adults	3rd party	Not stated	Relapsed/Refractory MM (>2 MM regimens)	BCMA CAR, TCR KO T cells	BCMA	TCR KO	30, 100, 300 x10^6 cells	Flu/Cy	Once	IMWG	2 pts PR at DL1 and DL2, 5 pts SD		3-4 weeks	Not stated		Ahmad-Samer Al-Homsi, Sebastien Anguille, Dries Deeren, Taiga Nishihori, Nathalie Meuleman, Maher Abdul-Hay, Gareth J. Morgan, Jason Brayer, Nathalie Braun, Caroline Lonez, Marie-Sophie Dheur, Erik Alcantar-Orozco, David Gilham, Anne Flament, Frédéric F. Lehmann; Immunicy-1: Targeting BCMA with Cyad-211 to Establish Proof of Concept of an shRNA-Based Allogeneic CAR T Cell Therapy Platform. Blood …
Ramos	NCT00840853	ASH Abstract	2021	5 adults	3rd party	1 HLA-unmatched healthy individual	Relapsed/Refractory NHL and ALL	CD19 CAR, IL-15, and shRNA targeting beta-2 microglobulin and CD74 (downregulation of HLA class I/II molecule)	CD19		1x10^7 and 3x10^7 cells/m2	Flu/Cy	Once	Lugano and NCCN	4 NHL: 3 PR and 1 CR; 1 ALL MRD Cri	Not stated	Not stated	Not stated		Carlos A. Ramos, Amy N. Courtney, Simon N. Robinson, Olga Dakhova, Premal D. Lulla, Rammurti Kamble, George Carrum, Tao Wang, Chunchao Zhang, Erica Di Pierro, Leonid S. Metelitsa; Allogeneic NKT Cells Expressing a CD19-Specific CAR in Patients with Relapsed or Refractory B-Cell Malignancies: An Interim Analysis. Blood 2021; 138 (Supplement 1): 2819. doi: https://doi.org/10.1182/blood-2021-149712
Li	ChiCTR1900025311	AACR Abstract	2021	6 adults	3rd party	Not stated	Relapsed/Refractory T ALL	CD7 CAR, CD7 KO, TCR KO T cells	CD7	TCR KO	6x10^6 cells/kg, 1x10^7 cells/kg, 1.5x10^7	Not stated	Once		5/6 MRD- CR	Not stated	Not stated	Not stated		Shiqi Li, Lei Gao, Zhongtao Yuan, Kun Wu, Lin Liu, Le Luo, Yao Liu, Cheng Zhang, Yu Li, Duanpeng Wang, Zhimin Li, Xu Tan, Ruihao Huang, Dingsong Zhang, Youcheng Wang, Xinxin Wang, Jia Liu, Martina Sersch, Sanbin Wang, Xi Zhang; Abstract LB147: Updates on clinical safety and efficacy result of GC027, the first-in-human, “Off-the-Shelf” CD7 CAR-T stand-alone therapy for adult patients with relapsed…
Holstein	NCT02955550	AACR Abstract	2019	15 adutls	3rd party	Not stated	Relapsed/Refractory MM	Placental CD34 cell derived NK cells		NK cells	10x10^6/kg +/- rhIL2, 30x10^6/kg +/- rhIL2 on day 14 or 30x10^6/kg + rhIL2 on day 7	Following autologous stem cell transplant	Once	International Myeloma Working Group	Day 90 5CR or sCR and 7 VGPR	Not stated	Not stated	Not stated		Sarah A. Holstein, Sarah A. Cooley, Parameswaran Hari, Sundar Jagannath, Catherine R. Balint, William van der Touw, Michele L. Donato, Philip L. McCarthy, Paul K. Wallace, Xiaokui Zhang, Robert J. Hariri, Mohamad A. Hussein, Ravi Vij; Abstract CT108: A Phase I study of PNK-007, allogeneic, off the shelf NK cell, post autologous transplant in multiple myeloma (NCT02955550). Cancer Res 1 July 2019;…
Cooley	NCT02781467	AACR Abstract	2019	10 adults	3rd party	Not stated	Relapsed/Refractory AML	Placental CD34 cell derived NK cells		NK cells	1, 3, 10x10^6/kg + rhIL2	Flu/Cy	Once	Not stated	2 achieved CR	3 and 10x10^6/kg: 7 to 28 days	Not stated	Not stated		Sarah Cooley, Parameswaran Hari, James McCloskey, Michael Byrne, Eunice Wang, Mohamad Hussein, Erica Giarritta, Xiaokui Zhang, Robert Hariri, Jeffrey S. Miller; Abstract CT079: A Phase I study of PNK-007, allogeneic, off the shelf NK cell in relapsed/refractory AML (NCT02781467). Cancer Res 1 July 2019; 79 (13_Supplement): CT079. https://doi-org.offcampus.lib.washington.edu/10.1158/1538-7445.AM20…
Kistler	Not stated	AACR Abstract	2020	9 adults	3rd party	Not stated	Triple negative breast cancer	high-affinity NK cells		NK cells	Not stated	chemoradiation, novel igG1 Fc-engineered IL15 complexed protein (N803), adenovirual and yeast tumor-associated antigen vaccines, PDL1 checkpoint inhibitor	Once	Not stated	ORR 56%, CR 22%	Not stated	Not stated	Not stated		Mira Kistler, Chaitali Nangia, Christina To, Lennie Sender, John Lee, Frank Jones, Omid Jafari, Tara Seery, Shahrooz Rabizadeh, Kayvan Niazi, Amy Rock, Patrick Soon-Shiong; Abstract P5-04-02: Safety and efficacy from first-in-human immunotherapy combining NK and T cell activation with off-the-shelf high-affinity CD16 NK cell line (haNK) in patients with 2nd-line or greater metastatic triple-negat…
Hu	NCT04227015	Clinical Cancer Research	2021	6 adults	3rd party, non-HLA matched, 1 donor/patient	Not stated	Relapsed/Refractory ALL	CD19 CAR, CD22 CAR, TCR KO, CD52 KO	CD19 and CD22	TCR KO	1 or 3x10^6/kg	FLU/CY/Allemtuzumab	Once	Not stated	5 MRD- CR/Cri	Not stated	Median 42 days	Not stated		Yongxian Hu, Yali Zhou, Mingming Zhang, Wengang Ge, Yi Li, Li Yang, Guoqing Wei, Lu Han, Hao Wang, Shuhui Yu, Yi Chen, Yanbin Wang, Xiaohong He, Xingwang Zhang, Ming Gao, Jingjing Yang, Xiuju Li, Jiangtao Ren, He Huang; CRISPR/Cas9-Engineered Universal CD19/CD22 Dual-Targeted CAR-T Cell Therapy for Relapsed/Refractory B-cell Acute Lymphoblastic Leukemia. Clin Cancer Res 15 May 2021; 27 (10): 2764…
Patel	NCT03841110	SITC	2020	14 adults	Not stated	Not stated	Advanced solid tumor or lymphoma	iPSC derived NK cells		NK cells	100 or 300x10^6/dose	Cy/Flu +/- checkpoint inhibitor	2 three weekly infusion cycles	Not stated	11 with stable disease	Not stated	Not stated	Not stated		Hong D, Patel S, Patel M, et al. Preliminary results of an ongoing phase I trial of FT500, a first-in-class, off-the-shelf, induced pluripotent stem cell (iPSC) derived natural killer (NK) cell therapy in advanced solid tumors. Journal for ImmunoTherapy of Cancer 2020;8:doi: 10.1136/jitc-2020-SITC2020.0380

## Sheet: Tbl 4 Anti-viral (incl PTLD) T
First author		Clinical Trials Identifier	Journal			Year	Study Population		Number Treated / Number Infusions	Donor Source	Number of donors banked / Number used	Donor Selection Algorithm for Individual Recipients	Indication			Cell Type		Generation	Dose per infusion (CD3+ unless otherwise stated)	Schedule	Response Definition	Overall Response Rate (%)		Response Kinetics, Durability		Cell Persistence		Cell Detection Method		Adverse Effects (No. subjects)	Comments				Reference
Tzannou		NCT2313857	Blood Advances			2019	post alloHCT		10 subjects/13 infusions	Diverse pool of CMV seropositive donors, not otherwise specified, from which was performed sequential selection-then-elimination of donors that could cover ≥ 2 of 8 shared HLA antigens for 666 HLA types from allogeneic HCT recipients.	8 banked / 6 used	≥ 2 of 8 shared HLA antigens	CMV infection ≥ 7 days despite antiviral therapy			T cell		Antigen-expanded T cell lines (stimulated by IE1 and pp65 pulsed irradiated PBMCs)	2 x 10^7/m^2	Q4w × 2, then Q2w	CR = undetectable virus. PR = 50% decrease in viral load. Assessed at 6 weeks after 1st infusion.	100%		70% CR/30% PR @ 6W		Up to ≥12 weeks		HLA-specific peptides (5 subjects)		Isolated fever (N = 1). No GvHD.	8 sequentially selected donors could cover 96% of the HCT recipients treated at Houston Methodist or Texas Children's Hospital. Concurrent antiviral medication was permitted.				Tzannou I, Watanabe A, Naik S, Daum R, Kuvalekar M, Leung KS, Martinez C, Sasa G, Wu M, Gee AP, Krance RA, Gottschalk S, Heslop HE, Omer B. "Mini" bank of only 8 donors supplies CMV-directed T cells to diverse recipients. Blood Adv. 2019 Sep 10;3(17):2571-2580. doi: 10.1182/bloodadvances.2019000371. PMID: 31481503; PMCID: PMC6737421.
Withers		NCT02779439	Blood Advances			2017	post alloHCT		30 [28 CMV, 1 ADV, 1 EBV] subjects / 50 infusions	Healthy stem cell donors at Westmead Hospital with common HLA types and CMV or EBV positive serostatus	31 banked / 15 used	≥ 1 of 6 shared HLA-antigens (-A, -B, -DRB1); highest number of HLA matches with antiviral activity thorugh the shared HLA antigen(s). Secondary preference to products with highest virus-specific MHC-tetramer CD8+ cells or IFNγ response.	Persistent or recurrent CMV (N - 28), EBV (N = 1) or adenovirus (N = 1) despite SOC therapy for ≥ 14 days			T cell		Antigen-expanded T cells lines (stimulated by donor monocytic dendritic cells pulsed with peptide pools from pp65, AdV5 Hexon, or EBV BZLF1/LMP2/EBNA-1)	1.37 to 5 x 10^7/m^2 (median 2 x 5 x 10^7/m^2)	Up to 4 infusions ≥ 2 weeks apart (from same or different VST donor)	CR = undetectable virus. PR = 50% decrease in viral load. Assessed as best response.	0.93		Cumulative 76%CR/17% PR @ 12 months. Median time to CR 59 days after 1st infusion. N = 14 of 23 subjects who achieved CR remained PCR negative or below the level of quantification for duration of follow-up.		Peak functional CMV-specific immunity occurred at a median of 44 days after 1st infusion (range 0 to 309 days)		IFNγ Elispot but no third-party donor-specific cell tracking		Acute GvHD (N = 2), no SAEs attributes to VSTs. One died of presumed CMV disease.	Reintroduction of antiviral medication after the final infusion was permitted. One of 31 patients did not receive treatment because no suitably HLA-matched product was available. Products from 8 donors were used in multiple patients. Eight subjects were administered VST products from > 1 donor. Seven centers participated; >95% of patients were treated wtihin 3 days of request, mainly as out-patie…				Withers B, Blyth E, Clancy LE, Yong A, Fraser C, Burgess J, Simms R, Brown R, Kliman D, Dubosq MC, Bishop D, Sutrave G, Ma CKK, Shaw PJ, Micklethwaite KP, Gottlieb DJ. Long-term control of recurrent or refractory viral infections after allogeneic HSCT with third-party virus-specific T cells. Blood Adv. 2017 Nov 2;1(24):2193-2205. doi: 10.1182/bloodadvances.2017010223. PMID: 29296867; PMCID: PMC57…
Leen		NCT00711035	Blood			2013	post alloHCT		50 [23 CMV, 18 ADV, 9 EBV] subjects / 73 infusions	Donors with common HLA types and CMV, EBV or ADV seropositivity, including HLA homozygous donors identified by the NMDP	32 banked / 18 used	Specificity for the target virus through a shared HLA allele. Secondary preference to maximize HLA matches.	CMV, EBV or adenovirus infection persisting ≥ 7 days despite SOC			T cell		T cells lines (stimulated by PMBCs and later EBV-transformed LBL cell lines) transduced with Ad5f35pp65 vector	2 x 10^7/m^2	Q2w	CR = undetectable virus, with resolution of signs/symptoms. PR = 50% decrease in viral load with alleviation of symptoms. For PTLD - ILWG criteria. Assessed at 6 weeks after 1st infusion.	0.74		Four responders had recurrence or progression.		12 wks max		High-throughput deep sequencing of TCRvß CDR3 regions (Adaptive, 6 subjects)		Acute GvHD (N = 2). Various AEs, including TMA, but none probably or definitely related to VSTs.	Continuation of anti-viral medication was permitted. Of 82 patients screened, a suitable line was identified for 74 subjects (90%) within 24 hours, of whom 50 were subsequently treated.				23610374Leen AM, Bollard CM, Mendizabal AM, Shpall EJ, Szabolcs P, Antin JH, Kapoor N, Pai SY, Rowley SD, Kebriaei P, Dey BR, Grilley BJ, Gee AP, Brenner MK, Rooney CM, Heslop HE. Multicenter study of banked third-party virus-specific T cells to treat severe viral infections after hematopoietic stem cell transplantation. Blood. 2013 Jun 27;121(26):5113-23. doi: 10.1182/blood-2013-02-486324. Epub …
Haque			Lancet			2002	post alloHCT (N = 1) or SOT (N = 7)		8 subjects / 23 infusions	EBV seropositive blood donors at Scottish National Blood Transfusion Services	70 cell lines banked, to cover all common haplotypes in the UK.	Each CTL line was approved for in-vivo use on the basis of high specific and low non-specific killing (>30% killing of patient LCLs, <15% killing of patient PHA blasts, and <10% killing of mismatched LCLs [not the target patient LCLs] and K562 in chromium release cytotoxicty assay. Similar criteria were applied when selecting a cell line for each patient. Also: ≥1 HLA-A and ≥1 HLA-B match.	PTLD unresponsive to standard therapy			T cell		Stimulation with autologous EBV-transformed LCLs from donor PBMCs	1 x 10^6/m^2	Q2w up to 6 times	WHO criteria for CR, PR, no responses applied at 6 months.	0.66		Two pts were unassesssable for tumor response so 50% [N = 3] CR after between 1 to 4 infusions for each patient / 25% [N = 1] PR after 2 infusions (declined further Rx).		Not assessed		N/A		None					Haque T, Wilkie GM, Taylor C, Amlot PL, Murad P, Iley A, Dombagoda D, Britton KM, Swerdlow AJ, Crawford DH. Treatment of Epstein-Barr-virus-positive post-transplantation lymphoproliferative disease with partly HLA-matched allogeneic cytotoxic T cells. Lancet. 2002 Aug 10;360(9331):436-42. doi: 10.1016/S0140-6736(02)09672-1. PMID: 12241714.
Haque		NCT00033475?	Blood (Transplantation for long-term follow-up)			2007 (2010 for long-term follow-up)	post allo HCT or SOT		33 subjects / unclear	EBV seropositive blood donors at Scottish National Blood Transfusion Services	100 banked / not explicitly stated	Maximize HLA match out of 6 (HLA-A, B, DR). Seconary preference to CTLs showing highest cytotoxicty in chromium release assays against autologous LGLs and low killing of patient PHA blasts and K562.	EBV+ PTLD after HCT or SOT			T cell		Antigen-expanded T cells lines (stimulated by LGLs)	2 x 10^6/kg	Q1wx4	CR = disappearance of all measurable tumor masses. PR = decrease 50% in size.	0.79		ORR 64% @ 5 weeks, 52% @ 6 months. No complete responders received further PTLD-directed treatment.		7 days after 2nd infusion max		TCRß CDR3 RT-PCR (5 subjects)		No	Subjects receiving CTLs with closer HLA matching responded better at 6 months. Products with >1% CD4+ T cells were associated with better response rate.				Haque T, Wilkie GM, Jones MM, Higgins CD, Urquhart G, Wingate P, Burns D, McAulay K, Turner M, Bellamy C, Amlot PL, Kelly D, MacGilchrist A, Gandhi MK, Swerdlow AJ, Crawford DH. Allogeneic cytotoxic T-cell therapy for EBV-positive posttransplantation lymphoproliferative disease: results of a phase 2 multicenter clinical trial. Blood. 2007 Aug 15;110(4):1123-31. doi: 10.1182/blood-2006-12-063008. …
Neuenhanh		EudraCT 2006-006146-34	Leukemia			2017	post alloHCT		8 subjects received third-party / 8 infusions	Deutsche Stammzellspenderdatei registry or patient's family (family not included in this table)	Not pre-banked; recruited on demand	Share ≥ 1 HLA class I allele restricted to the targeting CMV-specific T-cell response	CMV viremia ≥ 14 days after antiviral medication without detectable CMV-specific CD8+ T cells			T cell		MHC-Streptamer purification of CMV epitope-specific T cells from unstimulatd donor leukapheresis	Whole cohort (including original HCT donor-derived products): 780 to 872 CD8+ cells/kg	1x	CR = negative PCR on two consecutive study dates. PR = consecutively confirmed >80% reduction in viral load.	0.725		CR 50%/ PR 12.5%		Max 3 months (N = 1), but unable to detect donor-specific CDR3 sequence in 7 of 8 subjects.		CDR3 PCR		GvHD (N = 2)	Only 8 of 57 patients transplanted from CMV-negative donors received third-party CMV-specific T cells owing to difficulties with third-party donor identification in 17 as donor products were not pre-banked, and development of endogenous CMV-specific T cells in 32.				Neuenhahn M, Albrecht J, Odendahl M, Schlott F, Dössinger G, Schiemann M, Lakshmipathi S, Martin K, Bunjes D, Harsdorf S, Weissinger EM, Menzel H, Verbeek M, Uharek L, Kröger N, Wagner E, Kobbe G, Schroeder T, Schmitt M, Held G, Herr W, Germeroth L, Bonig H, Tonn T, Einsele H, Busch DH, Grigoleit GU. Transfer of minimally manipulated CMV-specific T cells from stem cell or third-party donors to tr…
Tzannou		NCT02108522	J Clin Oncol			2017	post alloHCT		38 subjects [7 were treated for 2 viruses - BK N=16, CMV 17, ADV 7, EBV 2, HHV-6 3]/ 47 infusions	Donors already donating marrow or PBSCs to related or unrelated recipients	59 VST lines banked/ 23 VST lines used. (NB: Unclear how many donors in this study; 48 donors were used to make the original bank (PMID 24964991))	Specificity for target virus through shared HLA alleles. Secondary preference to overall HLA match. Used epitope mapping, cytokine proiling and cytotoxicity to confirm antiviral activity through ≥ 1 shared HLA allele prior to selecting a VST line.	Drug-refractory infection or disease or unable tolerate SOC therapy			T cell		Antigen-expanded T cell lines (stimulated by Hexon, Penton (ADV), IE1, pp65 (CMV), EBNA1, LMP2, BZLF1 (EBV), VP1 and large T (BK), U11, U14, U90 (HHV-6) pulsed PBMCs)	2 x 10^7/m^2	Q4w × 2, then Q2w	CR = Return to normal range of qPCR assay and resolution of signs/symptoms. PR = ≥50% decrease in viral load or 50% improvement of signs/symptoms. Assessed after 1 infusion by week 6.	91.9% overall (CMV 94.1%, EBV 100%, ADV 71.4%, HHV-6 67%, BK 100%)		CMV CR 35%/PR 62.5%; EBV CR 100%; ADV CR 57%/PR 14%; HHV-6 PR 66%/not evaluable 33%; BK 100% achieved clinical benefit measured in various ways. N = 7 of 34 subjects who achieved CR/PR had recurrence (median at 10 wks), successfullly retreated in 6 of 7.		Up to 12 wks. Frequency of third-party-derived VSTs declined coincident with endogenous immune reconstitution.		HLA-restricted epitope peptides (16 subjects )		Fever (N = 1). GvHD (N = 6).	No suitable VST line for 2 of 56 patients screened.				Tzannou I, Papadopoulou A, Naik S, Leung K, Martinez CA, Ramos CA, Carrum G, Sasa G, Lulla P, Watanabe A, Kuvalekar M, Gee AP, Wu MF, Liu H, Grilley BJ, Krance RA, Gottschalk S, Brenner MK, Rooney CM, Heslop HE, Leen AM, Omer B. Off-the-Shelf Virus-Specific T Cells to Treat BK Virus, Human Herpesvirus 6, Cytomegalovirus, Epstein-Barr Virus, and Adenovirus Infections After Allogeneic Hematopoietic…
Qasim			Br J Haematol			2013 (and 2011)	peds post HCT		2 subjects received "third-party" haplo parent / 2 infusions	Parents of children with ADV infection (not original SCT donor)	Not pre-banked	IFNγ secretion responses against hexon	ADV resistant to cidofovir ± ribavirin			T cell		VSTs enriched in < 24h with IFNγ capture and CliniMacs® selection	1 x 10^4/kg	1x	Resolution of viremia	0.5		Subject with viral clearance experienced bystander GvHD (PMID 21501134)		>6 wks		Flow cytometry based on HLA disparities (PMID 21501134)		Bystander GvHD and vanishing bile ducts caused by original HCT donor T cells (N = 1, PMID 21501134), cytopenias (N = 1)	Early administration of cells (34 to 122 days) after original, T-cell depleted HCT. Unclear if cytopenias were related to the VSTs.				(1) Qasim W, Gilmour K, Zhan H, Derniame S, McNicol AM, Ip W, Hiwarkar P, Veys P, Gaspar HB. Interferon-γ capture T cell therapy for persistent Adenoviraemia following allogeneic haematopoietic stem cell transplantation. Br J Haematol. 2013 May;161(3):449-52. doi: 10.1111/bjh.12251. Epub 2013 Feb 22. PMID: 23432400. AND (2) Qasim W, Derniame S, Gilmour K, Chiesa R, Weber M, Adams S, Rao K, Amroli…
Doubrovina			Blood			2012	post alloHCT (2 UCB), large peds		5 subjects received third-party / 23 infusions	Consenting third party donors (N = 5); source list is not specified	Not pre-banked	Cytotoxicity assessed against autologous donor- and patient-derived EBV+ BLCL and EBV- PHA blasts, and then against a panel of allogeneic EBV-BLCL, each matching one of the HLA alleles expressed by the T cells. Frequency of EBV-specific T cells was measured by limiting dilution assays for CTLps and by FACS-based quantitation of IFNγ after secondary secoondary stimulation with autolgous EBV-BLCLs …	EBV+ PTLD			T cell		Depletion of monocytes and NK cells, followed by serial stimuation with irradiated autologous B95.8 strain EBV-transformed B-LCLs and culture. Most cell lines were >90% CD8+ T cells, but 3 lines were > 90% CD4+ T cells (includes original-donor-derived cell lines). Frequency of EBV-CLTs ranged from 66 to 6578 ps/10^6 cells	0.85 to 1 x 10^6/kg	Q1w	Definition of CR/PR/PD not clearly stated. Serial monitoring with CT, PET/CT and/or MRI and EBV DNA copy numbers in blood.	0.8		Third party: CR 80%, progression 20%. For whole cohort: Clinical improvement first detected 8-15 days after infusion, radiographic CR usually <3-6 months post-Rx.		Approx. 2-3 months		EBV-CTL precursors in blood quantified by limiting dilution pre transfer, then monthly × 4, but no donor specific cell tracking		No immediate reactions, no GvHD	Early (64-247) days post mainly T cell depleted HCT. Authors assert: In instances where donor cells used for adoptive therapy differend from the origin of the EBV-LPD, HLA disparities between the cell donor and the EBV-LPD likely contributed to treatment failures. Importance of evaluating donor or patient origin of EBV-PTLD: EBV-CTLs that were restricted by an HLA allele not shared by the EBV-LPD…				Doubrovina E, Oflaz-Sozmen B, Prockop SE, Kernan NA, Abramson S, Teruya-Feldstein J, Hedvat C, Chou JF, Heller G, Barker JN, Boulad F, Castro-Malaspina H, George D, Jakubowski A, Koehne G, Papadopoulos EB, Scaradavou A, Small TN, Khalaf R, Young JW, O'Reilly RJ. Adoptive immunotherapy with unselected or EBV-specific T cells for biopsy-proven EBV+ lymphomas after allogeneic hematopoietic cell tran…
Uhlin			CID			2012	5 post alloHCT (3 UCB), 1 pre-UCB		6 subjects / 6 infusions	Haploidentical relative	Not pre-banked	Not stated	CMV (N = 4), ADV (N = 1), EBV+ PTLD (N = 1) with poor response to standard treatment			T cell		PBMCs isolated from whole blood, then selected with peptide-containing/HLA pentamers; no stimulation/expansion	1.1 to 24.6 × 10^4/kg	1x (N = 4), 2x (N = 2, upon resurrgence of ADV at 2 weeks, EBV 184d apart per PMID 19908041)	CR = No detectable virus, PR = reduction in virus. No standardized timing of assessment.	CMV 100%, ADV 0, EBV 100%		CMV: 85% CR/25% PR; ADV no response; EBV 100% CR		≤ 76 days		STR PCR		None reported	The first infusion for one pt treated for EBV was reported as a case study (PMID 19908041)				Uhlin M, Gertow J, Uzunel M, Okas M, Berglund S, Watz E, Brune M, Ljungman P, Maeurer M, Mattsson J. Rapid salvage treatment with virus-specific T cells for therapy-resistant disease. Clin Infect Dis. 2012 Oct;55(8):1064-73. doi: 10.1093/cid/cis625. Epub 2012 Jul 17. PMID: 22806594.
Feuchtinger			Blood			2010	post UCB		2 subjects received third-party / 2 infusions	Mismatched unrelated	Not pre-banked	Not stated	CMV with increase viral load under antiviral chemotherapy or refractory CMV disease			T cell		PBMCs isolated from whole blood or leukapheresis, stimulated with pp65, then ClinicMacs enrichment of IFNγ secreting cells. (Frequency of IFNγ cells was ≥ 10% as assessed by flow cytometry)	2.78 x 10^4/kg and 1.2 x 10^4/kg	1x	Not explicit	0.5		Clearance of CMV infection in subject with CMV encephalitis (followed to d145), the other died of CMV pneumonia d28		Unclear. Transient in vivo expansion of CMV-specific T cells at 10-16 days.		No donor specific cell tracking		None					Kimura A, Mahara R, Tohma M, Ushijima K, Yuge K, Ono E, Yamashita F. Unusual 1 beta-hydroxylated bile acids in children with a paucity in interlobular bile ducts. Clin Chim Acta. 1989 Nov;185(2):215-7. doi: 10.1016/0009-8981(89)90048-x. PMID: 2625005.
Barker			Blood			2010	post UCB		2 subjects / 11 infusions	Mismatched unrelated	330 EBV-CTLs banked / 2 used	Cytotoxicity in chromium release assay against a panel of EBV+ and EBV- targets expressing one set of HLA A, B, C, DR, DQ alleles shared by the CTL donor. CTLs with closet HLA match to the UCB unit (and hence the lymphoma), restricted by one or more of the CTL donor's HLA alleles, were selected.	EBV+ PTLD progressing after ISP taper and rituximab			T cell		Monocyte/NK-cell depleted mononuclear cells stimulated with irradiation autologous EBV-BLCLs, and T cells restimulated weekly in culture with IL-2	1 x 10^6/kg	Subject 1: q21d x 3 then d86, d108; Subject 2: Q1wk x 3wks x 2 cycles	Not explicit	1		(1) Gradual reduction until CR confirmed d176 & ongoing at 20 months, (2) CR after cycle 2 (d106) & ongoing at 15 months		7-10d		HLA-restricted (CTL donor/lymphoma type) tetramer binding EBV-specific T cells pre and post CTL administration, where available		None reported					Barker JN, Doubrovina E, Sauter C, Jaroscak JJ, Perales MA, Doubrovin M, Prockop SE, Koehne G, O'Reilly RJ. Successful treatment of EBV-associated posttransplantation lymphoma after cord blood transplantation using third-party EBV-specific cytotoxic T lymphocytes. Blood. 2010 Dec 2;116(23):5045-9. doi: 10.1182/blood-2010-04-281873. Epub 2010 Sep 8. PMID: 20826724; PMCID: PMC3012598.
Prockop		NCT01498484 & NCT00002663	JCI			2020	post alloHCT (incl. 6 UCB) or SOT		46 subjects (HCT = 33, SOT = 13)/ not explicity stated (1 cycle in N=21 subjects, further cycles in N=25 subjects)	Third-party HCT donors selected to include 40 common class I HLA alleles that can restrict EBV epitopes; estimated to cover 95% of the New York population	330 EBV-CTLs banked / 55 used	HLA type, immune phenotype, lack of alloreactivity, EBV-specific cytotoxicity and HLA restriction as per Doubrovina et al.	EBV+ PTLD after failure of rituximab ± chemotherapy ± radiation			T cell		Monocyte/NK-cell depleted mononuclear cells stimulated with irradiation autologous EBV-BLCLs, and T cells restimulated weekly in culture with IL-2	1.0 or 2.0 x 10^6/kg	1 cycle = Q1wk x 3 weeks, then 3 weeks observation. Option to receive more cycles if not in CR.	International Workshop Criteria (PMID 25841712)	HCT - CR/sustained PR 68%; SOT CR/sustained PR 54%		Subjects with CR/PR after 1 cycle had 1-year OS = 88.9%; Subjects with stable disease after C1 had 1-year OS 81.8%. Maximal response was after C2.		< 5 days to 18 days (HCT subjects); Up to 23.7 months (SOT subjects)		STR PCR		Grade 1 GvHD skin (N = 1)	Utility of switching donors: In 3 of 5 subjects with progression after C1 who received EBV-CTLs from a difference donor, CR/sustained PR was achieved in 60%. Twelve of the HCT subjects had received TCD grafts. Having > 1 shared HLA allele restriction was associated with greater likelihood of response compared to only 1 shared allele restriction (CR+PR: 53.8% vs. 35.4%). This cell bank was license…				Prockop S, Doubrovina E, Suser S, Heller G, Barker J, Dahi P, Perales MA, Papadopoulos E, Sauter C, Castro-Malaspina H, Boulad F, Curran KJ, Giralt S, Gyurkocza B, Hsu KC, Jakubowski A, Hanash AM, Kernan NA, Kobos R, Koehne G, Landau H, Ponce D, Spitzer B, Young JW, Behr G, Dunphy M, Haque S, Teruya-Feldstein J, Arcila M, Moung C, Hsu S, Hasan A, O'Reilly RJ. Off-the-shelf EBV-specific T cell imm…
Papadopoulou		NCT01570283	Sci Transl Med			2014	post alloHCT		11 subjects / 11 infusions	Third-party HCT donors	48 multivirus-specific cell lines / not explicitly stated	Not explicity stated. Specificity for target virus if infection/reactivation.	Prophylaxis (N = 3) or treatment (N = 8 subjects with total 18 viral infections/reactivations from 5 different viruses)			T cell		Direct stimulation of PBMCs with overlapping peptide libraryies incorporateing EBV, CMV, AdV, BK, and HHV6 antigens (spanning EBV: LMP2, BZLF1, EBNA1; Adv: Penton, Hexon; CMV: pp65, IE-1; BK: VP1, large T; HHV6: U11, U14, U90.	5 × 10^6 to 2 × 10^7/msq	Once between days 38-43 (for prophylaxis), up to day 139 (for treatment) after HCT	Prophylaxis: Virus-free for > 3 months after infusion. Treatment: CR, PR not explicitly defined.	100% (prophylaxis); 94% (treatment)		Per subject: Only CR 63%/ CR to some viruses, PR to another 25%/CR to two viruses, NR to one virus 12.5%; Per infection/reactivation: CR 83%/PR 11%		Expansion of VSTs detected up to 12 weeks post infusion.		No donor specific cell tracking.		Grade 1 GvHD skin (N = 1); TMA deemed unrelated to VSTs (N = 2)					Papadopoulou A, Gerdemann U, Katari UL, Tzannou I, Liu H, Martinez C, Leung K, Carrum G, Gee AP, Vera JF, Krance RA, Brenner MK, Rooney CM, Heslop HE, Leen AM. Activity of broad-spectrum T cells as treatment for AdV, EBV, CMV, BKV, and HHV6 infections after HSCT. Sci Transl Med. 2014 Jun 25;6(242):242ra83. doi: 10.1126/scitranslmed.3008825. PMID: 24964991; PMCID: PMC4181611.
Muftuoglu		NCT02479698	NEJM			2018	Various: post UCB (N = 1), MPN post ruxolitinib (N = 1), HIV (N = 1)		3 subjects / 9 infusions	Healthy donors, source not explicitly stated	27 donors banked / not explicitly stated	Most closely matched (minimum requirement: ≥ 1 HLA class I and ≥ 1 HLA class II allele match)	PML			T cell		PBMCs pulsed with BK peptides: VP1, VP2, VP3, ST and LT and cultured in IL-2, IL-7, IL-15 for 14 days	2 x 10^5/kg	Various	Clinical symptoms, CSF and blood viral load	1		JC virus no longer detectable in blood (100%), in CSF( 67%). Neurologic recovery (CR 33%, partial 33%, died 33%).		>250d in CSF		Flow cytometry chimerism assay based on Bw4 and Bw6 mismatch		Various grade 1 effects, including radiological IRIS (N = 2)					Rezvani K, Marin D. Allogeneic BK Virus-Specific T Cells for PML. N Engl J Med. 2019 Jan 3;380(1):106. doi: 10.1056/NEJMc1815050. PMID: 30601739.
Sun			Br J Haematol			2002	EBV+ Hodgkin lymphoma (non-alloHCT)		1 subject / 3 infusions	Unrelated donor	Not pre-banked	≥ 3/6 unrelated donor identified by NMDP (was actually a 4/6 match)	EBV+ Hodgkin relapsed after autoHCT (N = 1)			EBV-specific T cells		EBV-transformed BLCL sensitization	5 x 10^6/kg	q14d ×3	Not explicit	1		PR: 50% decrease in size of index LNs at two months, biopsy-confirmed progression at 6 months. Donor cells not detectable in peripheral blood although EBV-specific CTLp increased post infusions (could be recipient origin). CTL from donor 3 showed specific cytotoxicity only to EBNA3b and c, but not to any of the Latency II antigens (LMP1, LMP2A and EBNA1).		Not detected		PCR for mismatched HLA Class II allele		None	Two subjects received HLA-matched sibling donor infusions and one received an infusion from father. They are not abstracted here. Of 13 patients screened, 4 died of rapidly progressive disease - perhaps showing a need for banked cell products or rapid product generation techniques.				Sun Q, Burton R, Reddy V, Lucas KG. Safety of allogeneic Epstein-Barr virus (EBV)-specific cytotoxic T lymphocytes for patients with refractory EBV-related lymphoma. Br J Haematol. 2002 Sep;118(3):799-808. doi: 10.1046/j.1365-2141.2002.03683.x. PMID: 12181048.
Gallot		NCT01823718	J Immunother			2014	EBV+ lymphoma or PTLD after SOT (N = 3), alloHCT (N = 5, including UCB = 3); autoHCT (N = 1).		11 subjects / 17 infusions	EBV seropositive, CMV seronegative blood donors at the Établissement Français du Sang	13 donors banked (each donor: 4 billion CTLs) / 7 used	≥ 1 match for HLA class 1 and EBV specificity through a shared HLA allele (priority); negative cytotoxicity test against the patient's PHA blasts; EBV-CTLs should have a cytotoxicity score > 15% against the autologous EBV-LCLs and it should be >twice that observed against the patient's PHA blasts (the latter remaining < 15%)	EBV+ lymphoma or PTLD in less than PR (< 50%) or relapse after monoclonal antibodies and/or chemotherapy			EBV-specific T cells		EBV-transformed BLCL sensitization	5 × 10^6/kg	1-3 doses; 3 wks between 1st and 2nd infusion	"Cheson criteria" (pub/yr not referenced); viral load	0.36		CR 27% / PR 9% at 6 months. Decreased viral load could be documented in only 1 subject.		Barely detectable at day 1 in 4 of 11 subjects, at day 10 in 3 subjects; never detected beyond 10 days.		RT-PCR for 19 SNPs		Transient fever (N = 1)	EBV-CTLs were highly polyclonal (as indicated by TCRß variable chain analysis). All but one CTL line contained >1% CD4+ T-cells. Closer HLA match and earlier time from transplant to CTL infusion were associated with CR.				Gallot G, Vollant S, Saïagh S, Clémenceau B, Vivien R, Cerato E, Bignon JD, Ferrand C, Jaccard A, Vigouroux S, Choquet S, Dalle JH, Frachon I, Bruno B, Mothy M, Mechinaud F, Leblond V, Milpied N, Vié H. T-cell therapy using a bank of EBV-specific cytotoxic T cells: lessons from a phase I/II feasibility and safety study. J Immunother. 2014 Apr;37(3):170-9. doi: 10.1097/CJI.0000000000000031. PMID: …
Naik - pts not previously published are extracted here		NCT01945814; NCT02510404; 2 EINDs	J Allerg Clin Immunol			2016	Primary immunodeficiency, pre-HCT (N = 1) or post HCT (N = 3)		4 subjects / 9 infusions	Various	Various	Various. Donors were 3/10 to 9/10 matched.	EBV-LPD pre or post HCT, EBV or CMV viremia; CMV disease			Various, including EBV-specific or multivirus-specific		Various (stimulation with B-LCLs, or PMBCs pulsed with overlapping CMV/EBV/ADV peptides)	2 × 10^6/kg (N = 2); 5 × 10^6/msq (N = 1); 2 × 10^7/msq (N = 1)	Various, up to 4 infusions per subject	Various	0.25		One subject with PR, but died at d26 after infusion with cerebral edema		Not explicitly stated		Not stated		Cerebral edema (N = 1)	Retrospective review of PID patients treated between 2003 and 2014 at 4 institutions. Only subjects receiving third-party, unrelated (not original stem cell donor or haploidentical) products and not published elsewhere are abstracted here.				Naik S, Nicholas SK, Martinez CA, Leen AM, Hanley PJ, Gottschalk SM, Rooney CM, Hanson IC, Krance RA, Shpall EJ, Cruz CR, Amrolia P, Lucchini G, Bunin N, Heimall J, Klein OR, Gennery AR, Slatter MA, Vickers MA, Orange JS, Heslop HE, Bollard CM, Keller MD. Adoptive immunotherapy for primary immunodeficiency disorders with virus-specific T lymphocytes. J Allergy Clin Immunol. 2016 May;137(5):1498-1…
Vickers		N/A	Br J Haematol			2014	Pre-HCT primary immunodeficiency (N = 1); HCT (N = 5), SOT (N = 4); Pre-HCT EBV viremia (N = 1 was not infused at time of writing, excluded here) (N = 1 paternal donor also excluded). Requests via Scottish National Blood Transfusion Service (SNBTS)		10 subjects / unclear if all subjects completed the 4 planned infusions	New Zealand Blood Service (to minimize the risk of CJD)	25 banked (selected according to an algorithm -- see Comments) /	EBV seropositive, preferably blood group O, maximize HLA class I and II matches, minimize number of mismatches	PTLD (N = 10); EBV viremia pre-HCT (N = 1, not infused at time of writing)			EBV-CTLs		Stimulation with B-LCLs	1-2 × 10^6/kg	Weekly x 4	Not explicit	0.8		CR: 8/10. Only the 2 subjects with no HLA class II matches showed no PTLD response. Time to response not clearly stabled.		Not stated		Not stated		GvHD (N = 1)	Donors were selected for banking based on HLA typing, according to a simulation using 200 donors from Auckland, New Zealand targeting 304 patients from East of Scotland renal treansplant waiting list, aiming to maximize the number of HLA class I and II matches and minimize the number of mismatches. Donor-recipient pairs were scores as 2 for 2 antigens shared at any one locus, 1 for one antigen sh…				Vickers MA, Wilkie GM, Robinson N, Rivera N, Haque T, Crawford DH, Barry J, Fraser N, Turner DM, Robertson V, Dyer P, Flanagan P, Newlands HR, Campbell J, Turner ML. Establishment and operation of a Good Manufacturing Practice-compliant allogeneic Epstein-Barr virus (EBV)-specific cytotoxic cell bank for the treatment of EBV-associated lymphoproliferative disease. Br J Haematol. 2014 Nov;167(3):4…
Kazi (F/U of Vickers report above)		N/A. Cell bank licensed in 2011.	Haematologica			2019	HCT (N = 28), SOT (N = 28), PID (N = 5), non-transplant chronic immunosupppression (N = 4), NHL non-transplant (N = 2). Requests via SNBTS.		64 patients treated (N = 59 6+ months follow-up included here)/ unclear total no. of infusions	New Zealand Blood Service (to minimize the risk of CJD)	25 banked (selected according to an algorithm -- see Comments above) /	EBV seropositive, preferably blood group O, maximize HLA class I and II matches, minimize number of mismatches	EBV-associated NHL or PTLD. All had failed rituximab and 18 had received chemotherapy.			EBV-CTLs		Stimulation with B-LCLs	1-2 × 10^6/kg	Weekly x 4	Not explicit	0.59		CR 39% / PR 20%. For post-HCT patients, median OS was 0.1 year (mean: 1 year). For SOT patients, median OS 3.87 years. For non-transplant cohort, median OS was not reached (mean 3.16 years) .		Not stated		Not stated		GvHD (N = 2); Temporary neurologic worseninged from tumor flare (N = 1)	Median pf 3 class I matches (range 0-6) and 2 class II matches (range, 0-4), and five overall matches (range, 2-9) out of 10 loci. Two patients received a second course from different donors. Responses were correlated with number of HLA matches, with 100% of patients with 8-10/10 HLA matches responding.				Kazi S, Mathur A, Wilkie G, Cheal K, Battle R, McGowan N, Fraser N, Hargreaves E, Turner D, Campbell JDM, Turner M, Vickers MA. Long-term follow up after third-party viral-specific cytotoxic lymphocytes for immunosuppression- and Epstein-Barr virus-associated lymphoproliferative disease. Haematologica. 2019 Aug;104(8):e356-e359. doi: 10.3324/haematol.2018.207548. Epub 2019 Feb 21. PMID: 30792197;…
Chiou		Treated on trial 1999-2004 and from the licensed bank as an Advanced Therpay Medicinal Product if 2011+	Pediatr Transpl			2018	peds post SOT		10 patients / 37 infusions	EBV seropositive blood donors at Scottish National Blood Transfusion Services	Not explicitly stated. Based on Haque et al, at least 100 donors were banked.	"Best match" (Pre-2005 - Out of 6; Ater 2005 - Out of 10 loci)	PTLD refractory to reduction of IS (pre-2000) or to rituximab (post-2000)			T cell		Stimulation with B-LCLs	2 x 10^6/kg	Q1wx4	CR = total clearance of tumor within 6 months after infusion. PR = tumor reduction by ≥50% if measurable, and patient clinically stable or improved.	0.8		70% CR / 10% PR		Not stated		Not stated		Transient fever, tachycardia, vomiting	Higher response rate amoung this pediatric, exclusively SOT cohort than reported by colleagues using the same bank (Haque et al) in mostly adult patients.				Chiou FK, Beath SV, Wilkie GM, Vickers MA, Morland B, Gupte GL. Cytotoxic T-lymphocyte therapy for post-transplant lymphoproliferative disorder after solid organ transplantation in children. Pediatr Transplant. 2018 Mar;22(2). doi: 10.1111/petr.13133. Epub 2018 Feb 1. PMID: 29388302.
Lucas			Cancer			2004	Hodgkin lymphoma		4 patients (excluding those with matched sibling donors) / unclear total number of infusions	Haploidentical relative (N = 3) or unrelated donor (N = 1)	Not pre-banked	≥ 3 of 6 HLA match (low resolution for HLA class I and class II high resolution)	Refractory Hodgkin lymphoma			T cell		Stimulation with autologous B-LCL	Cohort 1: 5 x 10^6/kg; Cohort 2: Fludarabine 30 mg/msq/d × 3 days, then 1.5 x 10^7/kg	Cohort 1: 3 infusions Q2w; Cohort 2: 1 infusion	Not explicit	0.75		0% CR, 75% PR		Not detected		PCR for mismatched HLA		None	Only study to use lymphodepleting chemotherapy				Lucas KG, Salzman D, Garcia A, Sun Q. Adoptive immunotherapy with allogeneic Epstein-Barr virus (EBV)-specific cytotoxic T-lymphocytes for recurrent, EBV-positive Hodgkin disease. Cancer. 2004 May 1;100(9):1892-901. doi: 10.1002/cncr.20188. PMID: 15112270.
Shultze-Florey			Front Immunol			2018	peds post SOT		1 subject / 5 infusions	A 5/10 HLA-matched unrelated donor, unclear how sourced	Not pre-banked	5/10 match	CNS PTLD refractory to rituximab and chemotherapy			T cell		Peptide stimulation (ppEBNA1 and ppSelect) in combination with IFNγ capture	2 x 10^4/kg	5 infusions (1 fresh, 4 cryopreserved) Q3w	Not explicit	1		100% CR - continued 2 years after last cell infusion		4 donor-derived clones could be detected 7 months after transfer		NGS TCR profiling		Atopic dermatitis, no GvHD	Immunosuppression was also tapered and response correlated with epitope spreading from endogenous immune response. TCR profiling also showed the third-party cells expanded and likely contributed to the response.				Schultze-Florey RE, Tischer S, Kuhlmann L, Hundsdoerfer P, Koch A, Anagnostopoulos I, Ravens S, Goudeva L, Schultze-Florey C, Koenecke C, Blasczyk R, Koehl U, Heuft HG, Prinz I, Eiz-Vesper B, Maecker-Kolhoff B. Dissecting Epstein-Barr Virus-Specific T-Cell Responses After Allogeneic EBV-Specific T-Cell Transfer for Central Nervous System Posttransplant Lymphoproliferative Disease. Front Immunol. …
Fabrizio		NCT02136797 (original donor derived), NCT01646645 (third party), NCT00674648 (original donor derived)	Blood Advances			2021	post alloHCT		76 subjects / > 134 infusions	MSKCC cell bank derived from healthy HCT donors	135 banked / unclear # used	Not explicity stated.	CMV viremia on 2 separate occasionas, despite ≥ 14 days of antiviral medication or CMV disease			T cell		Stimulation of CAMS loaded with overlapping 15-mer peptides spanning pp65	Not stated	Not stated	CR = undetectable CMV DNA . If CMV disease: clearance of infection by repeat tissue biopsy or lavage. PR = 2 log reduction in CMV DNA in blood. If disease: resoluton of clinical symptoms.	0.4		Not stated		Not stated		N/A		Not reported	This study was designed to assess the recipient's CD4 and CD8 immune reconstitution. CMV-CTLs interact with host immunity: Recipients with a baseline CD4 > 50 × 10^6/L had higher response to therapy.				Fabrizio VA, Rodriguez-Sanchez MI, Mauguen A, Dahi PB, Doubrovina E, O'Reilly RJ, Prockop SE. Adoptive therapy with CMV-specific cytotoxic T lymphocytes depends on baseline CD4+ immunity to mediate durable responses. Blood Adv. 2021 Jan 26;5(2):496-503. doi: 10.1182/bloodadvances.2020002735. PMID: 33496746; PMCID: PMC7839363.
O'Reilly			Bone Marrow Transplant			2019	post alloHCT or non-HCT hematologic malignancy		165 subjects (N = 93 for EBV, N = 72 for CMV), including subjects reported previously	MSKCC cell bank derived from healthy HCT donors	135 banked / unclear # used	Not discussed	EBV+ lymphoma, PTLD, CMV viremia, CMV disease			T cell		Stimulation of CAMS loaded with overlapping 15-mer peptides spanning pp65	Not discussed	Not discussed	EBV - not explicit; CMV - PR = 2 log reduction in CMV DNA and resolution of all symptoms.	After alloHCT: EBV 68%, CMV 64%		For allo-HCT related PTLD, PRs could be durable (>2 to >7 years)		N/A		N/A		Only 2 of 83 subejcts who were post-HCT developed GvHD	Review article of Memorial Sloan-Kettering experience. Emphasizes the necessity of the virus-specific T-cell to recognize the targeted viral antigen in the context of its restricting allele to achieve complete tumor regression. Also discussed in O'Reilly et al, Bone Marrow Transplant 2015 (PMID 26039207)				O'Reilly RJ, Prockop S, Hasan A, Doubrovina E. Therapeutic advantages provided by banked virus-specific T-cells of defined HLA-restriction. Bone Marrow Transplant. 2019 Aug;54(Suppl 2):759-764. doi: 10.1038/s41409-019-0614-1. PMID: 31431697; PMCID: PMC8115858.
Jiang		ACTRN12618000343202	Blood Advances			2022	post alloHCT		30 subjects (N = 3 for EBV/PTLD, N = 27 for CMV viremia) / 41 infusions	Westmead Hospital healthy donors	12 donors banked, 11 donors used (5 donors used in multiple patients) / 17 monovalent products banked (7 CMV, 5 EBV and 5 adenovirus specific not reported here), 13 products used	Maximize the number of HLA matches with antiviral activity through shared HLA antigen(s) out of 6 (HLA-A, -B, -DRB1). Secondary preference to the product with the highest proportion of virus-specific responses through shared allele(s). (2 donors were typed only in low resolution.)	Initiation of antiviral therapy for EBV or CMV (or adenovirus, of which none reported here)			T cell		Peptide stimulation: pp65 and EBV consensus peptides. Then CD137+ cells were selected and co-cultured up to 11 days with irradiated/peptide-pulsed CD137 negative cells in IL-2, IL-7, and IL-15.	2 x 10^7/m^2	Q≥2 weeks, max 4 infusions (median 1.4 infusions/patient)	CR = undetectable viral load by qPCR with resolution of symptoms/signs. PR = 50% decrease in viral load with alleviation of symptoms and signs. ILWG 2017 criteria for EBV-PTLD responses.	1		CR 94%. Concomittant antiviral Rx was given. Better HLA match (>2) was associated with fewer repeat antiviral courses (p = 0.046). Median day to CR was 25 days after 1st infusion, and not different for those who received >1 infusion. CMV+ patients with CMV- donors took longer to respond than CMV+/+. Durability of response was excellent, wiht most CMV+ patients not needing antiviral treatment afte…		Median 55 days but at very low quantities (≤ 3 gene copies/100 ng DNA). (Not detected beyond 120 days.)		Digital droplet PCR microchimerism assay		Acute GvHD 13%. Chronic GvHD 23%.	Compared to a historical cohort of patients treated for CMV viremia with drugs alone, a lower % of patients receiving VSTs needed a 3rd antiviral course (6.4% vs 20.5%), median total duration of CMV treatment in first 12 months after HCT was 21.5 vs 32 days, and a lower proportion of patients had CMV tissue disease (3.7% vs. 20.5%) and non-relapse mortality was improved (11.1% vs. 20.5%).				Jiang W, Clancy LE, Avdic S, Sutrave G, Street J, Simms R, McGuire HM, Patric E, Chan AS, McCaughan G, Myers N, Michlethwaite KP, Antonenas V, Selim AG, Ritchie D, Bateman CM, Shaw PJ, Blythe E, Gottlieb D. Third-party CMV- and EBV-specific T cells for first viral reactivation after allogeneic stem cell transplant. Blood Advances. 2022 Sep;6(17):4949-4966. doi: 10.1182/bloodadvances.2022007103. P…

## Sheet: Tbl 5 - Anti-cancer - OngoingNK
Selected ongoing clinical trials using adoptive NK cell therapies.
Cell Source	Gene Engineering	Combined Therapy	Clinical Trials Identifier	Indication
iPSC-derived NK cells (FT500)	N/A	Monotherapy or in combination with anti-PD1 mAb (nivolumab or pembrolizumab) or anti-PD-L1 mAb (atezolizumab), and IL-2	NCT03841110(Phase 1)	Advanced solid tumors
UCB-derived NK cells	N/A	Chemotherapy cyclophosphamide and etoposide	NCT03420963(Phase 1)	Relapsed or refractory solid tumors
N/A	Irradiated high-affinity CAR targeting PD-L1 (PD-L1 t-haNKs)	Anti-PD-1 mAb (pembrolizumab) and IL-15 superagonist (N803)	NCT04847466(Phase 2)	Gastric or head and neck cancer
NK92 cells	Express CAR targeting Robo1	N/A	NCT03941457and NCT03940820(Phase 1 and 2)	Pancreatic cancer and other solid tumors
NK92 cells	Express CAR targeting HER2	N/A	NCT03383978(Phase 1)	Recurrent HER2-positive Glioblastoma
UCB-derived NK cells	Delete TGF-BetaR2 and NR3C1	N/A	NCT04991870(Phase 1)	Recurrent glioblastoma
“Off-the-shelf” NK cells	Express CAR targeting HER2	N/A	NCT04319757(Phase 1)	Advanced or metastatic HER2-expressing solid tumors
iPSC-derived NK cells	Express high-affinity non-cleavable CD16 (FT516)	Fc-optimized humanized IgG1 anti-B5-H3 mAb (enoblituzumab)	NCT04630769(Phase 1)	Ovarian cancer
iPSC-derived NK cells	Express high-affinity non-cleavable CD16 (FT516)	Anti-PD-L1 mAb (avelumab)	NCT04551885(Phase 1)	Advanced solid tumors
iPSC-derived NK cells	Delete CD38, express an IL-15 receptor alpha fusion protein and a high-affinity non-cleavable CD16	Multiple monoclonal antibodies	NCT05069935(Phase 1)	Advanced solid tumors
